# Supplementary material
Source: PubMed Central journal article supplement (PMC2699942)
Supplement: NIHMS106871-supplement-01.pdf [file NIHMS106871-supplement-01.pdf]

## Lee et al., Supplemental figure legends

### Lee et al., Figure S1 Mitosis-specific TRF1 mobility shift.

(a) Interphase and mitotic HeLa cells were immunoblotted with antibodies raised against the N-terminal 319 residue of TRF1 (top panel) or anti-Abl antibodies, with the mitosis-specific mobility shift of Abl as control. (b) 35S-TRF1 synthesized by TNT was incubated with Xenopus cell cycle extracts, showing a obvious mitosis-specific mobility shift.

### Lee et al., Figure S2 Identification of domains and residue responsible for the Pin1 and TRF1 interaction.

(a) Pin1 WW domain, but not PPIase domain interacts with TRF1. Cells expressing TRF1 were incubated with glutathione-agarose beads containing GST, GST-Pin1 or GST-Pin1 truncated mutants. After washing, binding proteins were subjected to immunoblotting analysis with anti-HA 12CA5 mAb. (b) Pin1 binds to the TRF homology domain of TRF1. Cells expressing Xpress tagged TRF1 and its different truncated mutants were subjected to GST-Pin1 pulldown, followed by immunoblotting using anti-Xpress antibodies. (c) Pin1 binding to TRF1, but not TRF1T149A. Cells were transfected with GFP-TRF1, TRF1S11A, TRF1T149A, TRF1T324A or TRF1T351A vector and then subjected by GST-Pin1 pulldown, followed by immunoblotting with anti-TRF1 antibodies. Full scans for c are presented in Fig. S12.

### Lee et al., Figure S3 Cdk inhibitor abolishes TRF1 binding to Pin1.

TRF1-transfected HT1080 cells were treated with various kinase inhibitors or control buffer, followed by GST-Pin1 pulldown assay. Selective kinase specificity of the inhibitors are Roscovitine for Cdks, Chelerythine for PKCs, U0126 for MEKs, JNK inhibitor II for JNKs, SB203580 for p38 MAP kinases, GSK-3 inhibitor X for GSK-3s and H89 for PKA.

### Lee et al., Figure S4 Pin1 knockdown increases protein stability of TRF1 in HT1080 cells.

(a) Generation of stable Pin1 knockdown cells. HT1080 cells were infected with Pin1-shRNA or control constructs, followed by selection for stable with puromycin. Cells were then lysed and subjected to immunoblot with anti-Pin1 or anti-b-actin antibodies. (b, c) Inhibition of Pin1 increases endogenous TRF1 protein stability. Pin1-shRNA stably expressing HT1080 cells were treated with cycloheximide (100 g/ml) for indicated time points, followed by immunoblotting analysis with anti-TRF1, anti-b-actin or anti-Pin1 antibodies (b) and semi-quantification using b-actin as a loading control and relative TRF1 levels at time 0 as 100% (c).

### Lee et al., Figure S5. Pin1 knockdown in various human cell lines.

(a) Pin1 knockdown in normal telomerase-negative cells. WI38 Cells were stably infected with Pin1-shRNA lentiviruses and vector viruses and selected for stable pools, followed by immunoblotting analysis with anti-Pin1 or anti-actin antibodies. (b) Pin1 knockdown in on cells overexpressing TERT and TER. HT1080 cells were infected with TERT retroviruses and TER lentiviruses, and then with Pin1-shRNA lentiviruses, or control vectors and were selected triple stable cell pools, followed by immunoblots or quantitative RT-PCR for TER and GAPDH. (c) Pin1 knockdown in TRF1 silenced cells. HT1080 cells were infected with TRF1-shRNA retroviruses and then with Pin1-shRNA lentiviruses, or control vectors and selected for double infected stable cell pools, followed by immunoblots with various antibodies.

**Lee et al., Figure S6 Pin1 knockdown causes gradual and progressive telomere shortening in HT1080 cells.**

TRF lengths in two additional independent Pin1-shRNA and one vector control HT1080 stable clones were measured at different PDs using genomic Southern blotting.

**Lee et al., Figure S7 Pin1 knockdown does not induce telomere shortening in telomerase-negative GM847 cells.**

TRF lengths in two independent Pin1-shRNA and one vector control GM847 stable clones were measured at different PDs using genomic Southern blotting.

**Lee et al., Figure S8 The concomitant ablation of TRF1 in Pin1 silenced cells corrects the observed telomere shortening.**

TRF lengths in two additional independent TRF1-shRNA and Pin1-shRNA cells and one vector control HT1080 stable pools were measured at different PDs using genomic Southern blotting.

**Lee et al., Figure S9 TRF1 knockdown causes telomere elongation in MEFs.**

TRF1-shRNA or vector control interphase MEFs were fixed and hybridized with a Cy3-labeled PNA (CCCTAA)<sub>3</sub> probe, followed by quantifying their telomere fluorescence intensity at over 1,000 telomeres.

**Lee et al., Figure S10 Pin1 knockout causes telomere loss in mice.**

Total splenocytes were isolated from Pin1 WT and Pin1 KO littermates, and then hybridized with a FITC-labeled telomere PNA probe, followed by DNA counterstaining with LDS751. The stained cells were directly subjected to the FACS flow cytometry (a) or after sorting using B cell marker CD45R/B220 (b), with cells containing the G0/G1 DNA content being analyzed.

**Lee et al., Figure S11 Pin1 knockout causes accelerated telomere loss in mice.**

Metaphase spreads were prepared from Pin1<sup>+/+</sup> and Pin1<sup>-/-</sup> splenocytes and hybridized with a FITC-labeled PNA (CCCTAA)<sub>3</sub> probe, followed by quantifying their telomere fluorescence intensity at over 1,000 telomeres.

**Lee et al., Figure S12 Full scans of key Western blots presented in the manuscript.**

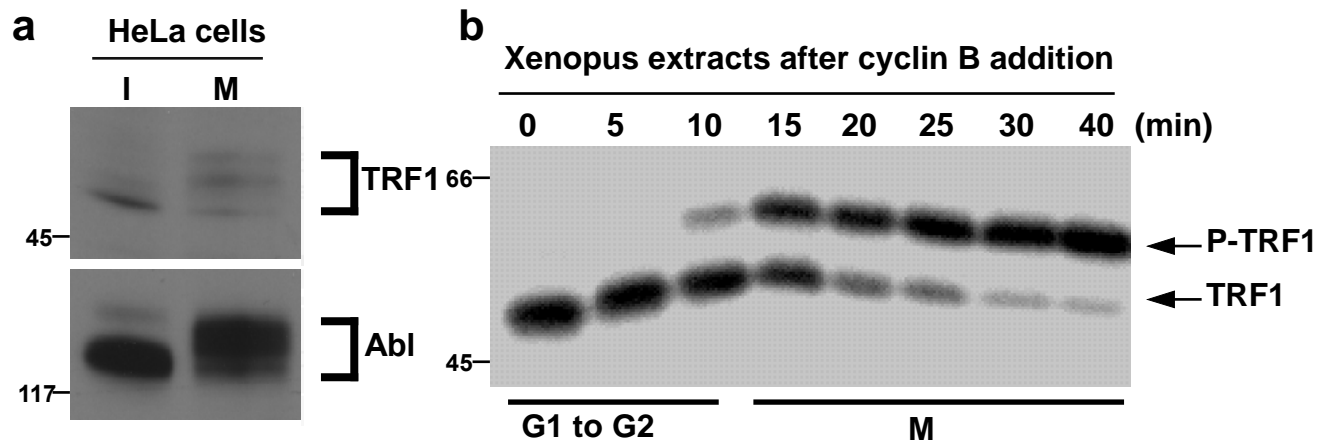

Lee et al., Figure S1

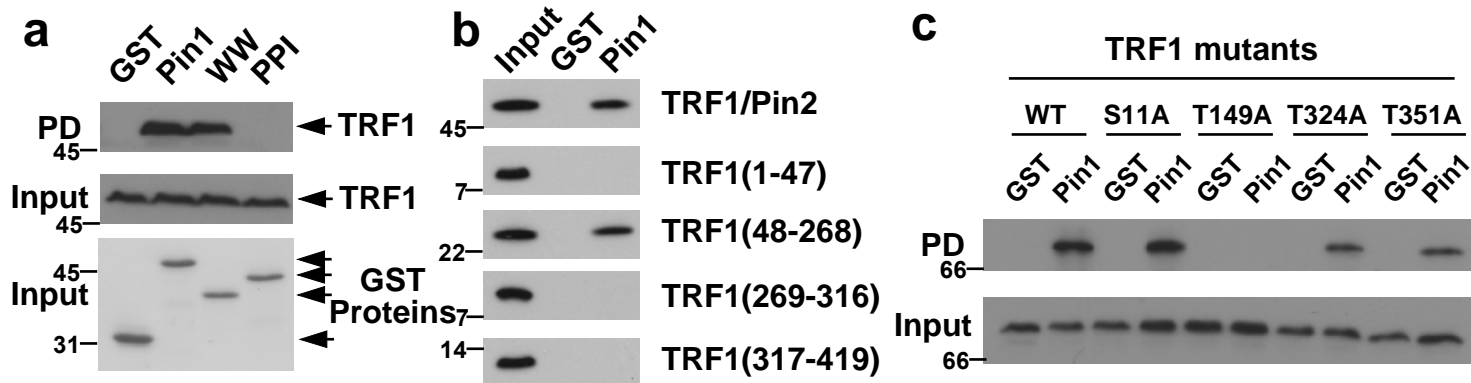

Lee et al., Figure S2

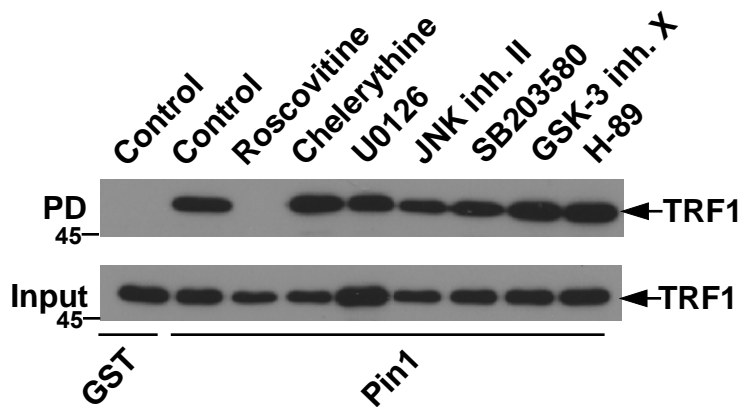

Lee et al., Figure S3

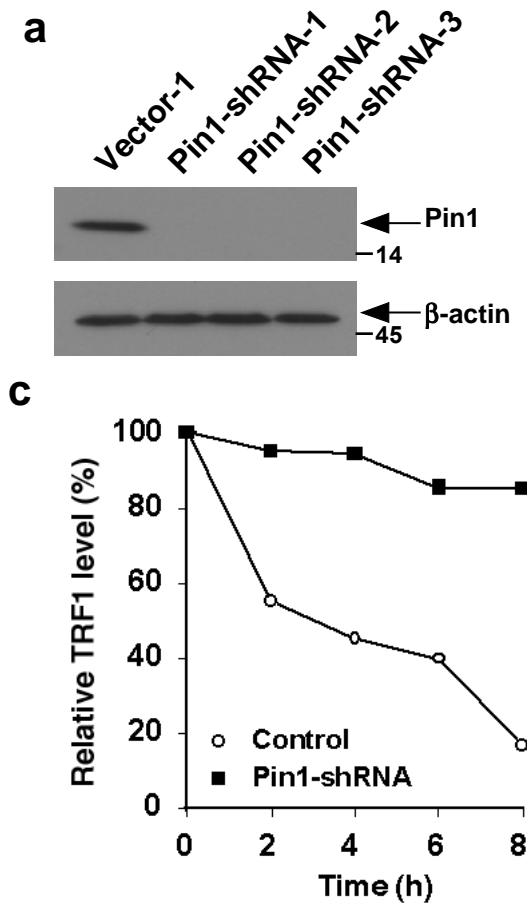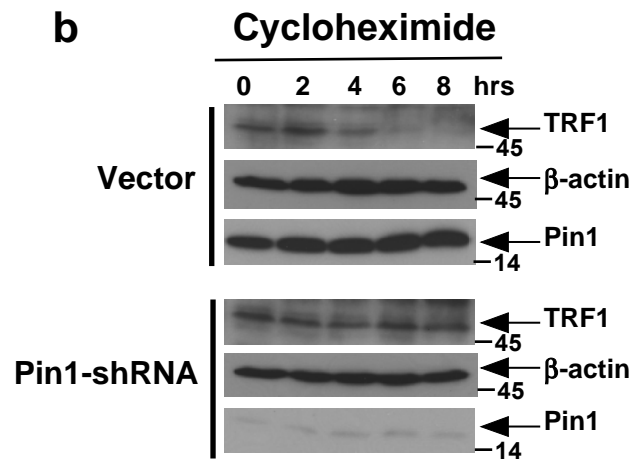

Lee et al., Figure S4

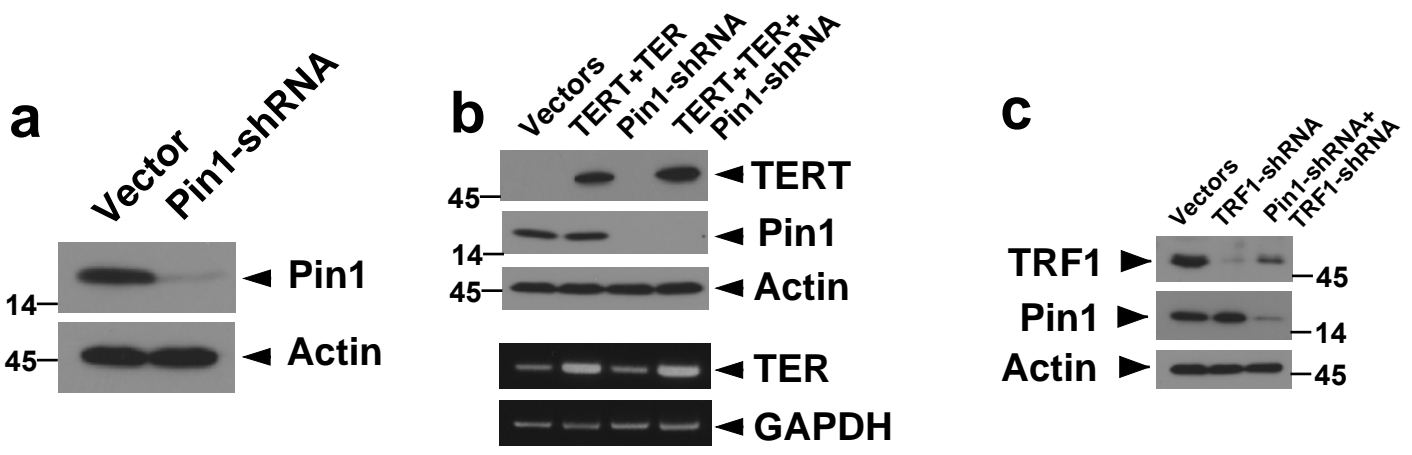

Lee et al., Figure S5

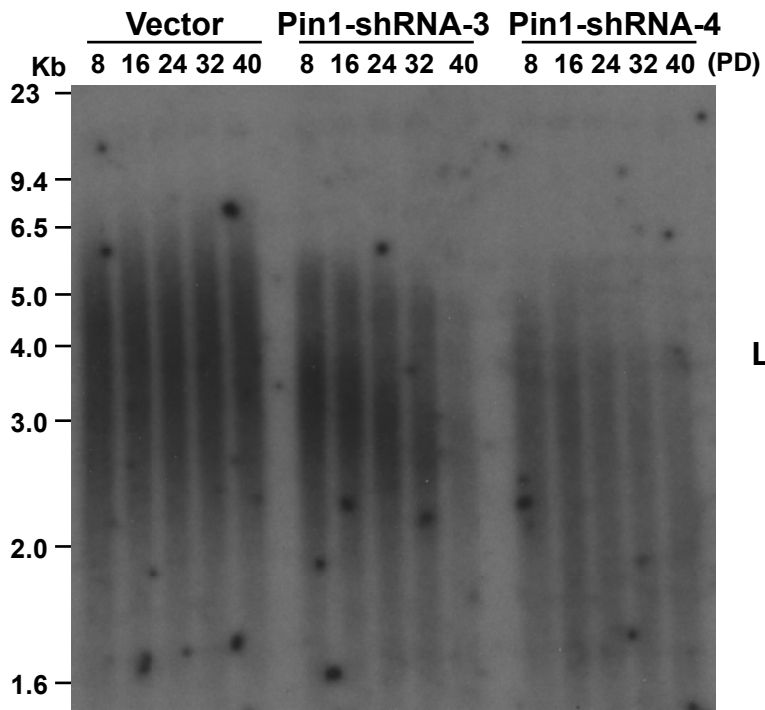

Lee et al., Figure S6

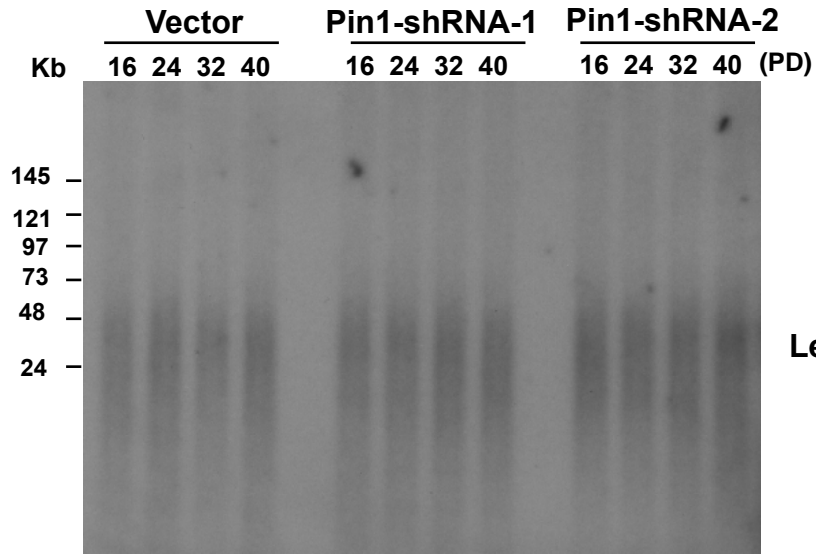

Lee et al., Figure S7

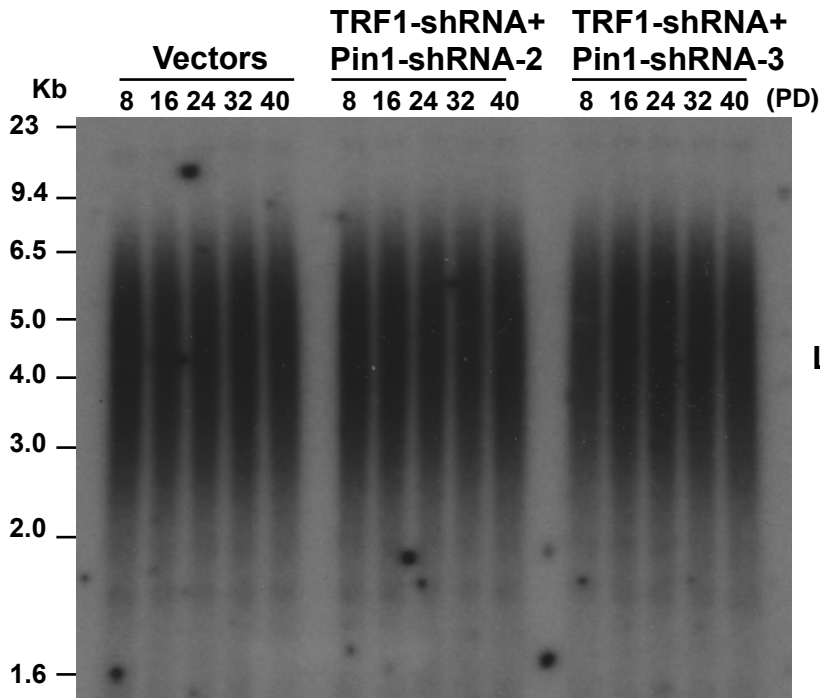

Lee et al., Figure S8

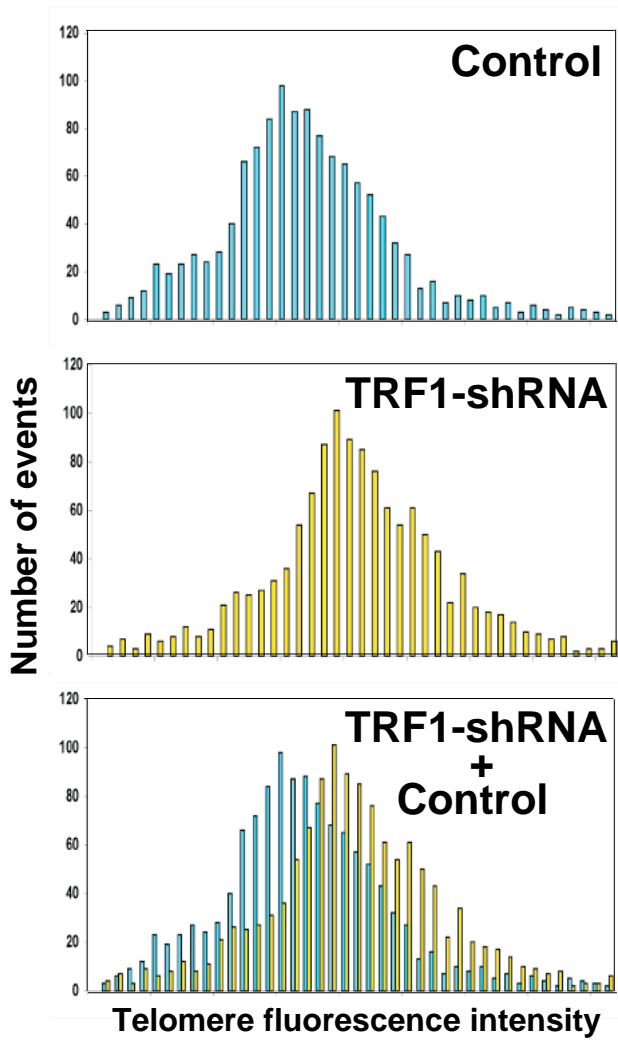

Lee et al., Figure S9

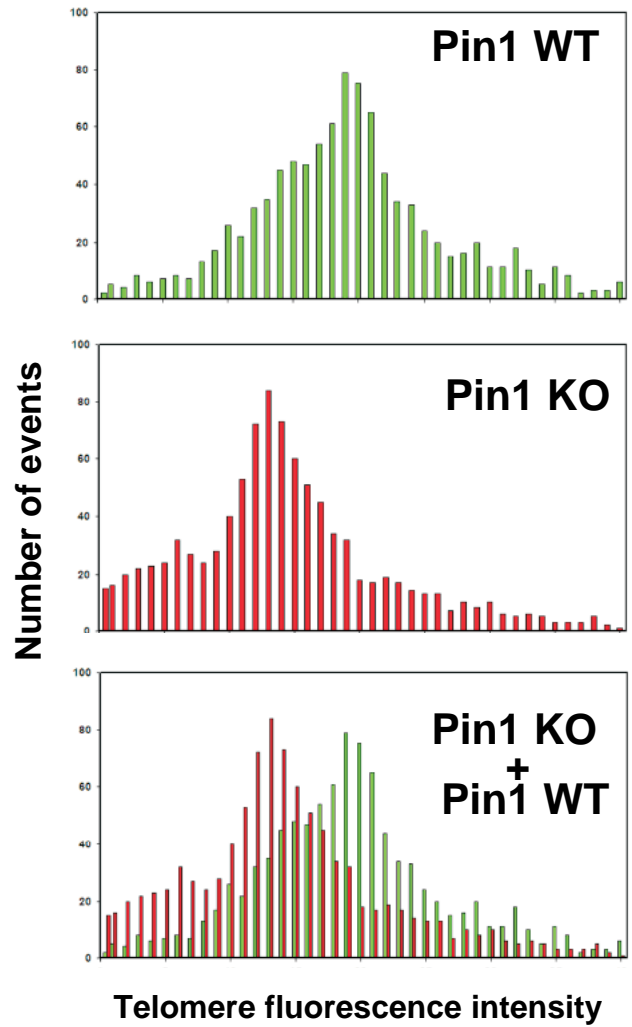

Lee et al., Figure S11

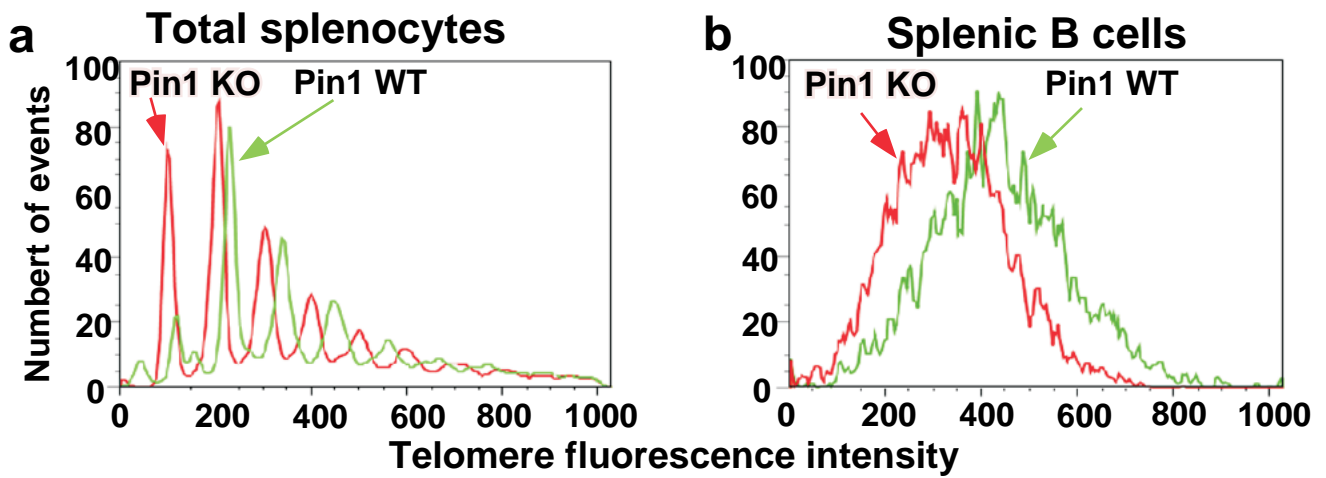

Lee et al., Figure S10

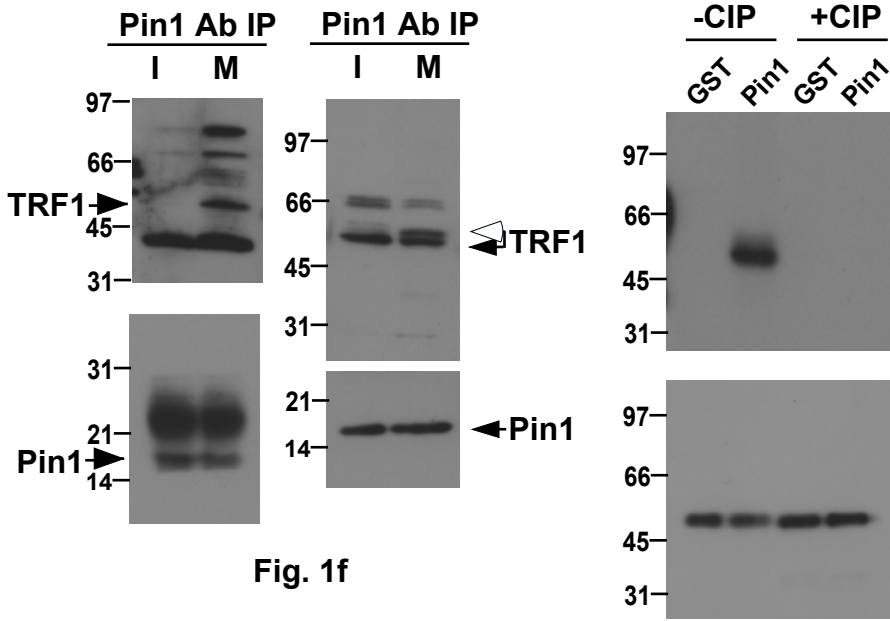

Fig. 1f

Fig. 1i

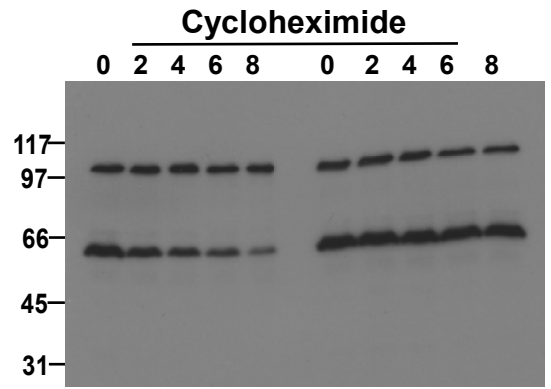

Fig. 2e

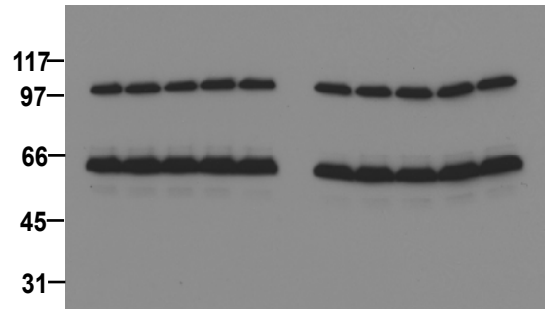

Fig. 2i

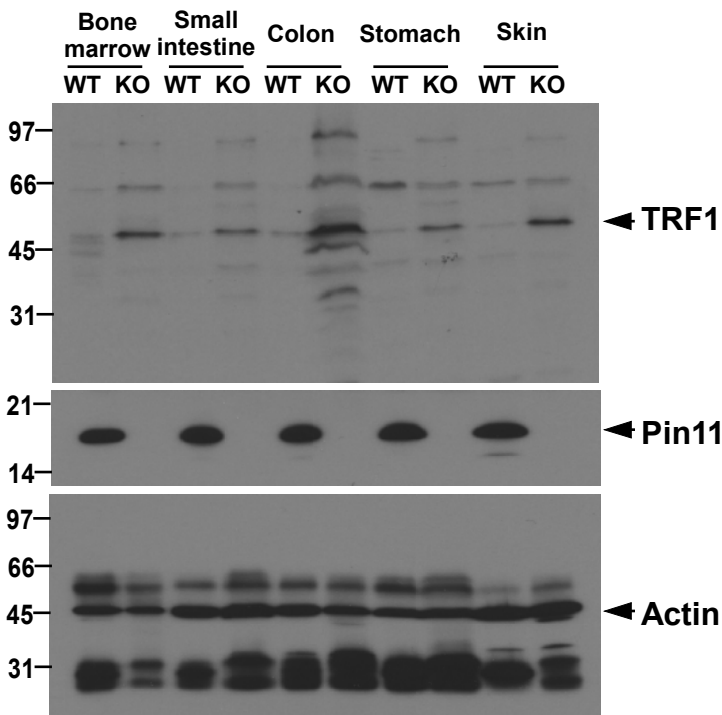

Fig. 5c

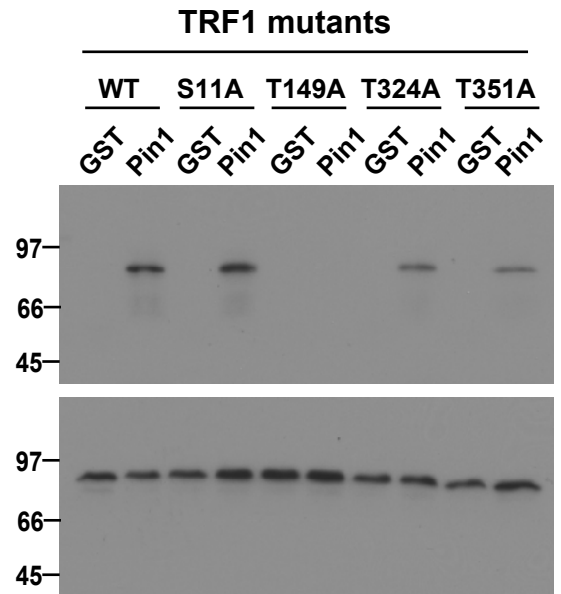

Fig. S2c
